# Supplementary material
Source: publisher figshare collection journal article supplement (https://acs.figshare.com/ndownloader/files/26451074)
Supplement: Supplementary file 1 [file 26451074]

# Fabricating nanodiamonds from biomass by direct laser writing under ambient conditions

*Yan Lin,<sup>†,‡</sup> Qijun Zhang,<sup>‡</sup> Yongjun Deng,<sup>†</sup> Kuizhong Shen<sup>†</sup> Kaimeng Xu,<sup>§</sup> Yongchao*

*Yu,<sup>††</sup> Siqun Wang,<sup>\*,‡</sup> and Guigan Fang<sup>\*,†</sup>*

*<sup>†</sup> Institute of Chemical Industry of Forestry Products, CAF; Key Lab of Biomass Energy and Material, Jiangsu Province; Co-Innovation Center of Efficient Processing and Utilization of Forest Resources, Jiangsu Province; National Engineering Lab for Biomass Chemical Utilization; No.16, 5<sup>th</sup> Suojin, Xuanwu District, Nanjing 210042, PR China; email address: fanguigan@icifp.cn*

*<sup>‡</sup> Center for Renewable Carbon, University of Tennessee, 2506 Jacob Drive, Knoxville, TN 37996, USA; email address: swang@utk.edu*

*<sup>§</sup> College of Materials Science and Engineering, Southwest Forestry University, 300 Bailongsi, Panlong District, Kunming, 650224, PR China*

*<sup>††</sup> Department of Mechanical, Aerospace and Biomedical Engineering, University of Tennessee, 1512 Middle Drive, Knoxville, TN 37996, United States*

Number of pages: 11

Number of Figures: 8

Number of Tables: 3

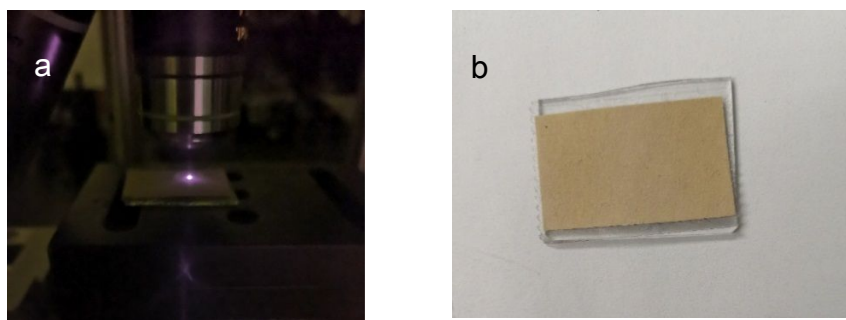

**Figure S1.** (a) Photograph of laser irradiating the CNF film; (b) the CNF film with paper substrate after laser irradiation.

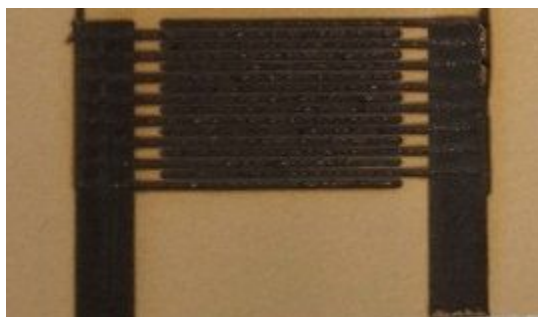

**Figure S2.** Photograph of a paper-based sensor from LCNF composites by femtosecond laser irradiation.

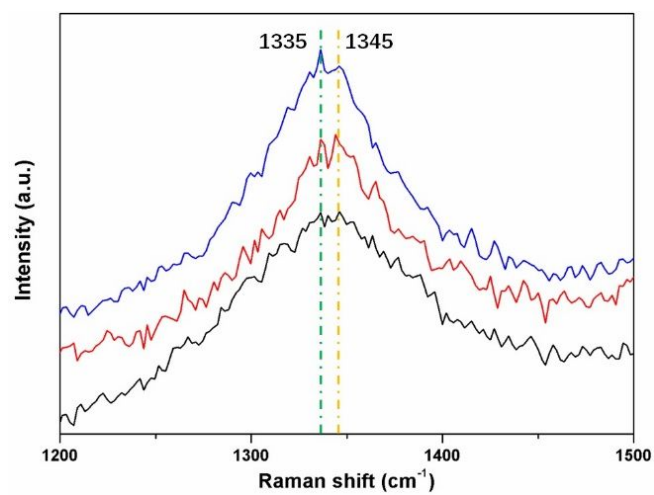

**Figure S3.** Raman spectra of P600S3.5 pattern.

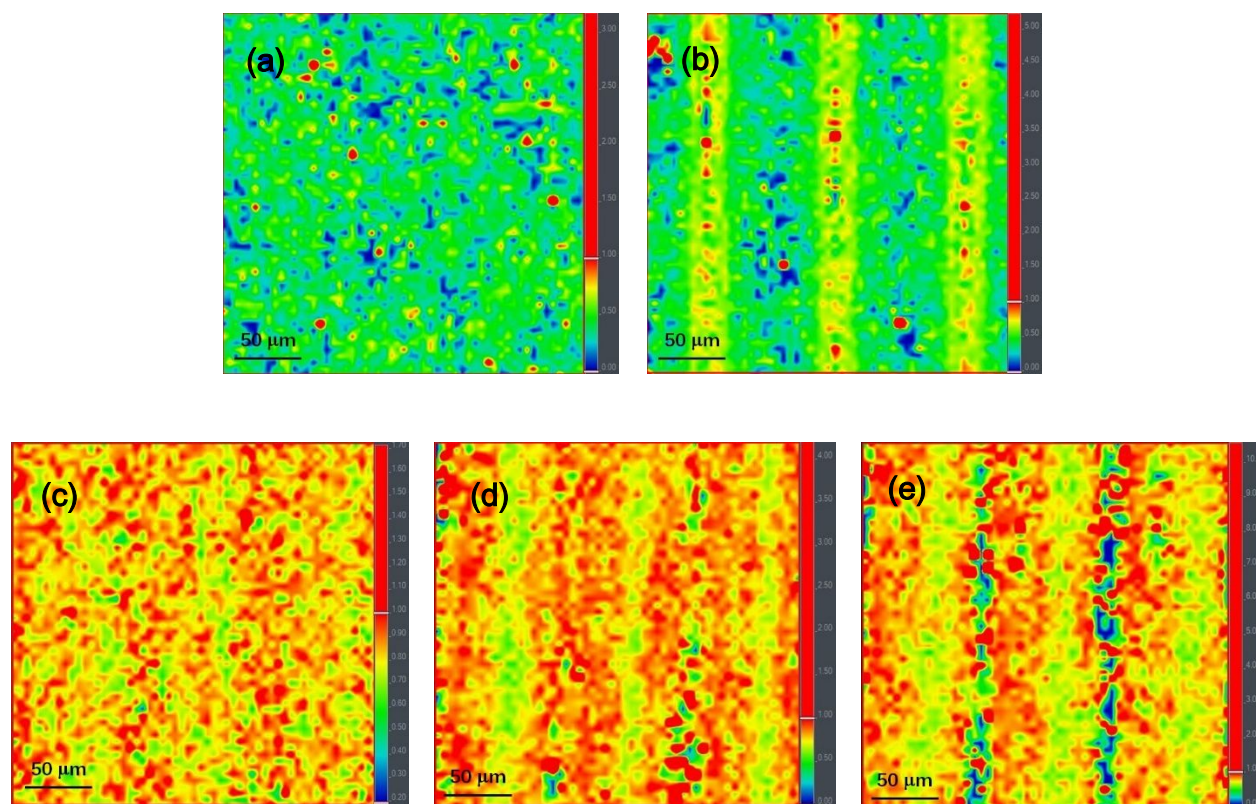

**Figure S4.** A selection of 2D Raman spectra mapping of  $I_D/I_G$ : (a) H-LCNF film; (b) P150S3.5 pattern; (c) P300S3.5 pattern; (d) P450S3.5 pattern; (e) P600S3.5 pattern.

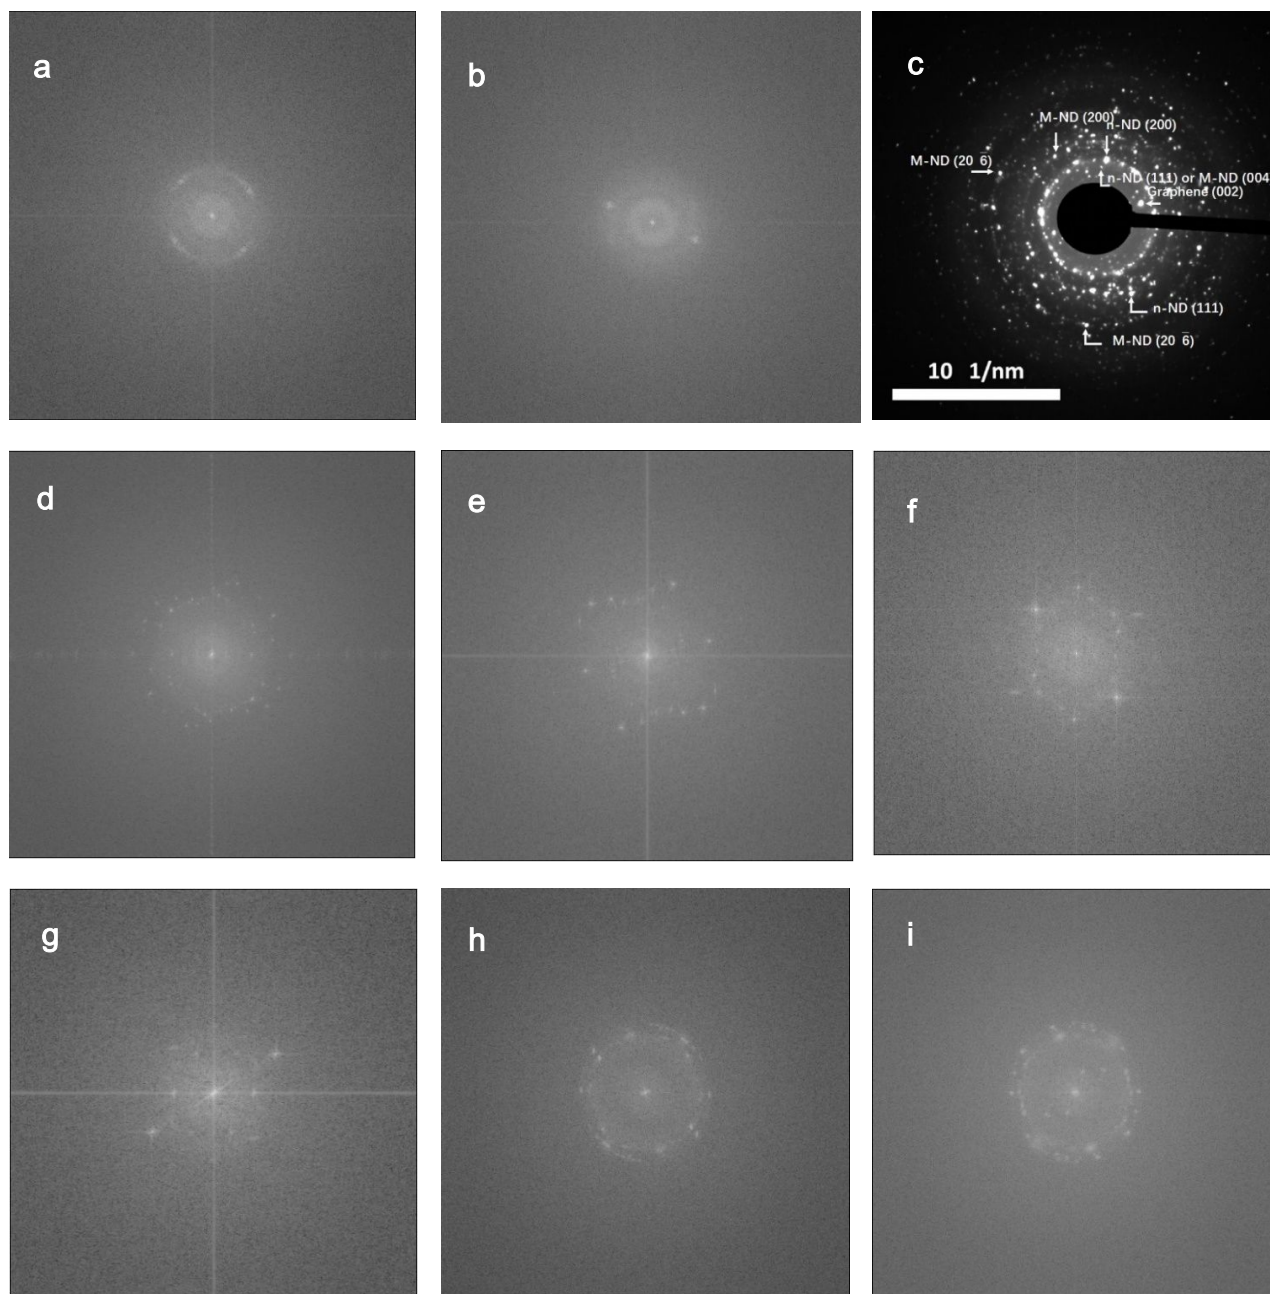

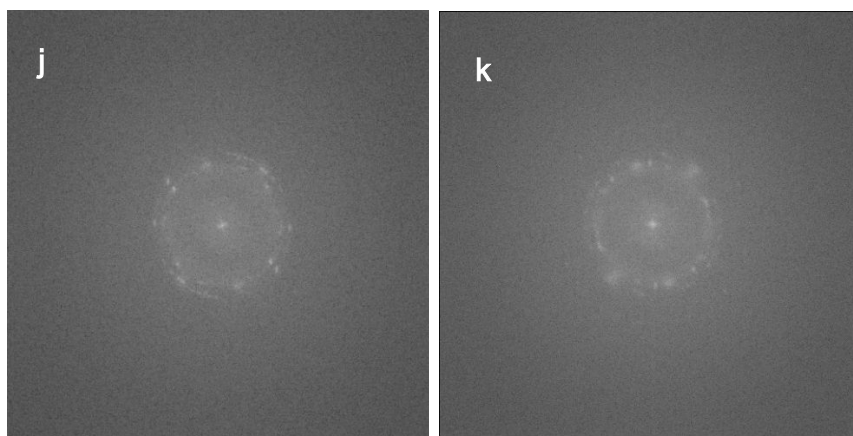

**Figure S5.** The Fast Fourier Transform (FFT) patterns: (a) the red part in **Figure 4a**; (b) **Figure 4b**; (d) upper left part in **Figure 4c**; (e) upper right part in **Figure 4c**; (f) lower left part in **Figure 4c**; (g) lower right part in **Figure 4c**; (h) **Figure 4e**; (i) **Figure 4f**; (j) **Figure 4g**; (k) **Figure 4h**. Image (c) was a typical SAED of NDs in P600S3.5 pattern.

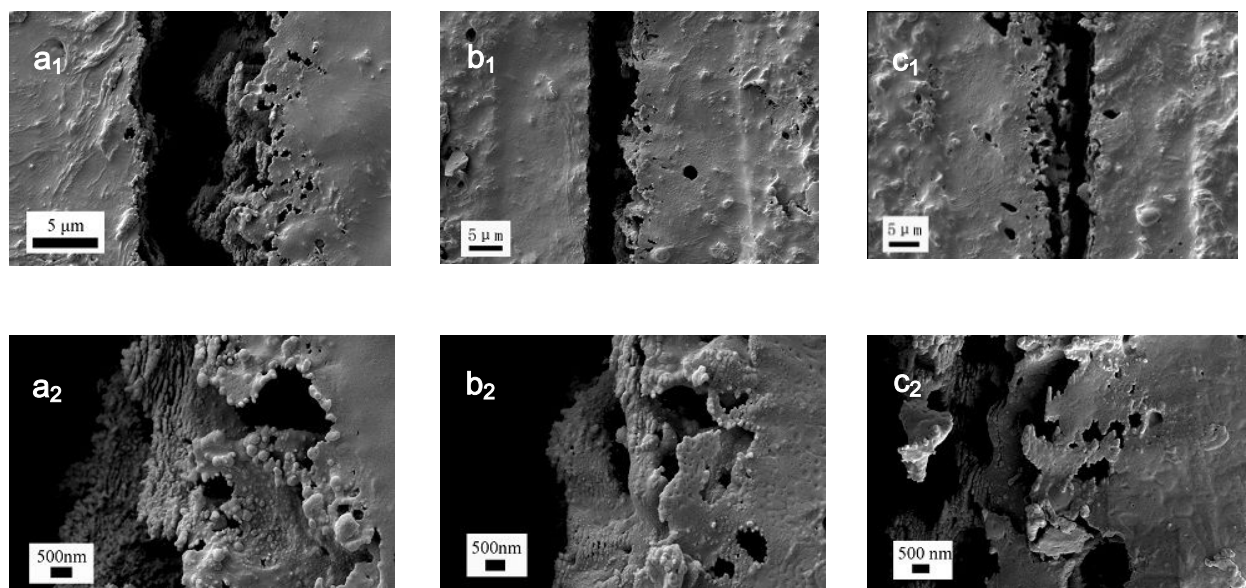

**Figure S6.** SEM images of laser-induced patterns at different laser writing speeds (H-LCNF film): (a) 1 mm/s; (b) 2.5 mm/s; (c) 3.5 mm/s.

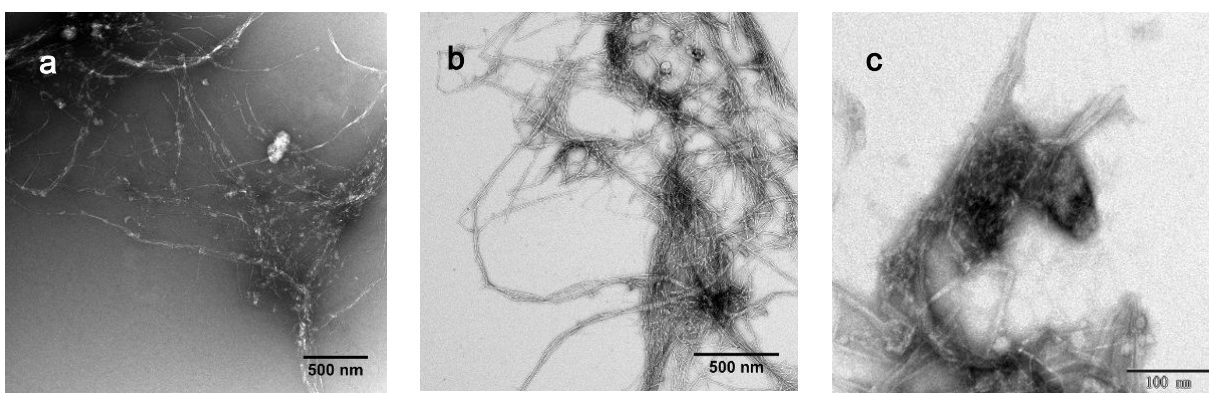

**Figure S7.** TEM images of LCNF: (a) L-LCNF; (b) M-LCNF; (c) W-LCNF.



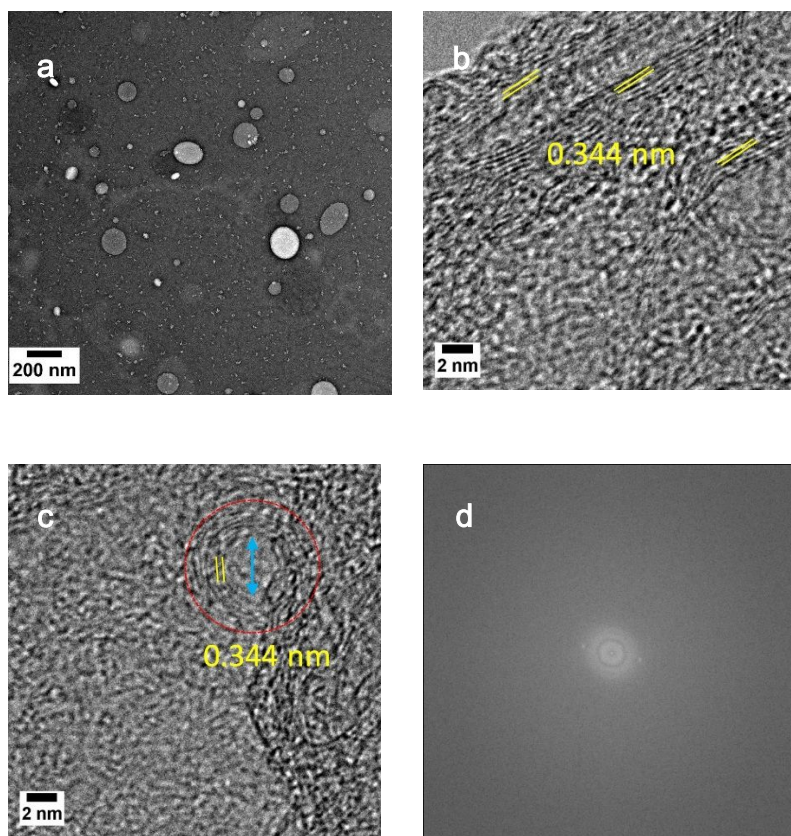

**Figure S8.** (a) TEM images of nano-lignin; (b-c) High-resolution TEM micrographs of laser-induced nano-lignin pattern in **Figure 8d**; (d) The Fast Fourier Transform (FFT) patterns of the selected parts in **Figure 8f**.



**Table S1** Parameters of hydrothermal pretreatment and the main chemical compositions of switchgrass after pretreatment

| Groups  | Temperature/<br>°C | Time/<br>min | Cellulose content/<br>% | Hemicellulose content/<br>% | Lignin content/<br>% |
|---------|--------------------|--------------|-------------------------|-----------------------------|----------------------|
| Control | -                  | -            | 35.85                   | 25.68                       | 28.81                |
| H-LCNF  | 200                | 60           | 46.19                   | 2.48                        | 36.67                |
| M-LCNF  | 180                | 90           | 47.83                   | 2.83                        | 30.54                |
| L-LCNF  | 180                | 30           | 50.74                   | 1.96                        | 26.70                |
| W-LCNF  | 120                | 60           | 32.91                   | 19.33                       | 28.66                |

**Table S2** Comparison of d-spacings of laser-induced NDs (LI-ND) with some reported NDs

| Type of ND | LI-ND        | MW-ND <sup>1</sup> | M-ND <sup>2</sup> | n-ND <sup>3</sup> | n-ND <sup>4</sup> | h-ND <sup>1, 5</sup> | ND <sup>6</sup> |
|------------|--------------|--------------------|-------------------|-------------------|-------------------|----------------------|-----------------|
|            | (this study) |                    |                   |                   |                   |                      |                 |
| d-spacings | 0.315        | 0.319              | 0.312             | 0.315             |                   |                      |                 |
| in nm      |              |                    | (004)             | (111)             |                   |                      |                 |
|            | 0.272-0.273  | 0.266-0.272        |                   | 0.273             |                   |                      |                 |
|            |              |                    |                   | (200)             |                   |                      |                 |
|            | 0.254        |                    |                   |                   |                   | 0.253                |                 |
|            |              |                    |                   |                   |                   | (110)                |                 |
|            | 0.230        |                    |                   |                   |                   |                      | 0.230           |
|            | 0.217        | 0.218-0.226        | 0.217             |                   |                   | 0.218                |                 |
|            |              |                    | (200)             |                   |                   | (100)                |                 |
|            | 0.208-0.209  | 0.209              |                   |                   | 0.206-0.209       | 0.206                |                 |
|            |              |                    |                   |                   | (111)             | (002)                |                 |
|            | 0.154        | 0.153              | 0.151             |                   |                   | 0.150                |                 |
|            |              |                    | (20 $\bar{6}$ )   |                   |                   | (102)                |                 |

**Table S3** Square resistance of laser-induced patterns

| Groups                            | P150S3.5 | P300S3.5 | P450S3.5 | P600S3.5 | NL-900 |
|-----------------------------------|----------|----------|----------|----------|--------|
| Square resistance/(k $\Omega$ /□) | 65.41    | 18.01    | 1.33     | 11.17    | 0.51   |

## References

- (1) Roy, S.; Bajpai, R.; Biro, R. P.; Wagner, H. D. Fast growth of nanodiamond in a microwave oven under atmospheric conditions. *J. Mater. Sci.* **2020**, *55*, 535-544.
- (2) Huang, Q.; Yu, D.; Xu, B.; Hu, W.; Ma, Y.; Yanbin Wang; Zhao, Z.; Wen, B.; He, J.; Liu, Z.; Tian, Y. Nanotwinned diamond with unprecedented hardness and stability. *Nature* **2014**, *510*, 250-253.
- (3) Xiao, J.; Li, J. L.; Liu, P.; Yang, G. W. A new phase transformation path from nanodiamond to new-diamond via an intermediate carbon onion. *Nanoscale* **2014**, *6*, 15098-15106.
- (4) Wen, B.; Zhao, J. J.; Li, T. J. Synthesis and crystal structure of n-diamond. *Int. Mater. Rev.* **2007**, *52* (3), 131-151.
- (5) Yang, L.; May, P. W.; Yin, L.; Smith, J. A.; Rosser, K. N. Growth of diamond nanocrystals by pulsed laser ablation of graphite in liquid. *Diam. Relat. Mater.* **2007**, *16*, 725-729.
- (6) Das, T.; Saikia, B. K. Nanodiamonds produced from low-grade Indian coals. *ACS Sustain. Chem. Eng.* **2017**, *5*, 9619-9624.
